# Supplementary material for: Association of Obesity With Breast Cancer Outcome in Relation to Cancer Subtypes: A Meta-Analysis
Source: PubMed Central journal article supplement — J Natl Cancer Inst. 2021 Feb 23;113(11):1465–75. doi: 10.1093/jnci/djab023 (PMC8562970; doi:10.1093/jnci/djab023), 2021-02-23
Supplement: djab023_supplementary_data.pdf [file djab023_supplementary_data.pdf]

**Supplementary Figure 1- Sensitivity Analysis: Association of Obesity, Defined Strictly as BMI  $\geq 30$  kg/m<sup>2</sup>, with Disease-free Survival (DFS) and Overall Survival (OS) in Relation to Breast Cancer Subtypes Hormone Receptor Positive and HER2 Negative (HR+HER2-), HER2 Positive (HER2+) and Triple Negative (TN)\***

**1A- DFS in HR+HER2- Breast Cancer**

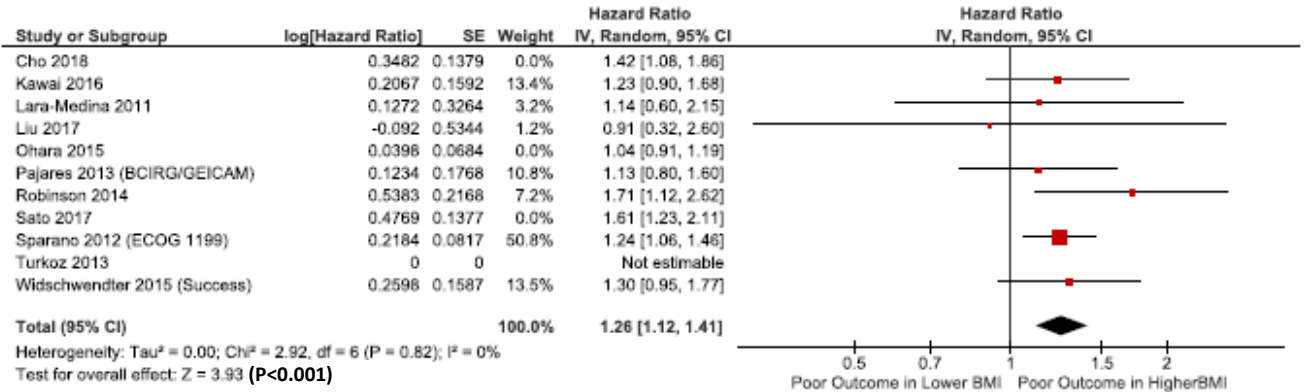

**1B- OS in HR+HER2- Breast Cancer**

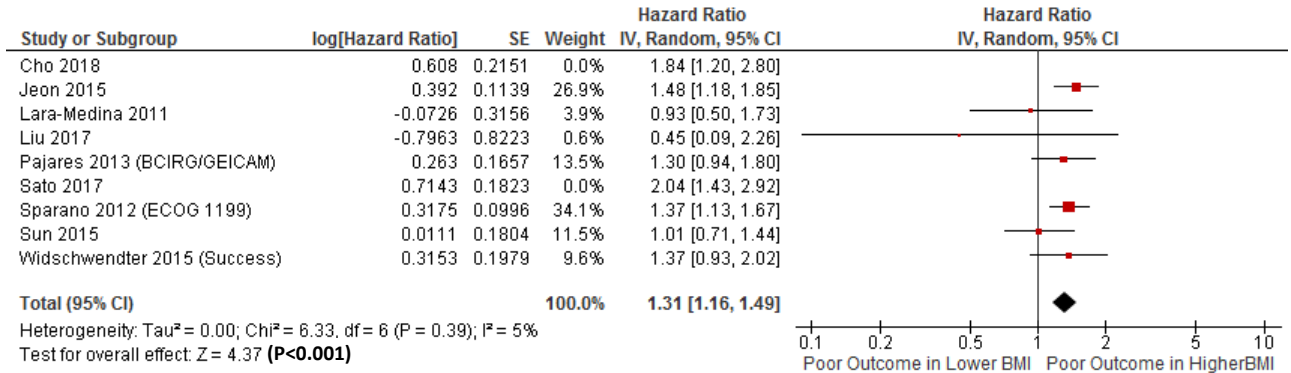

**1C- DFS in HER2+ Breast Cancer**

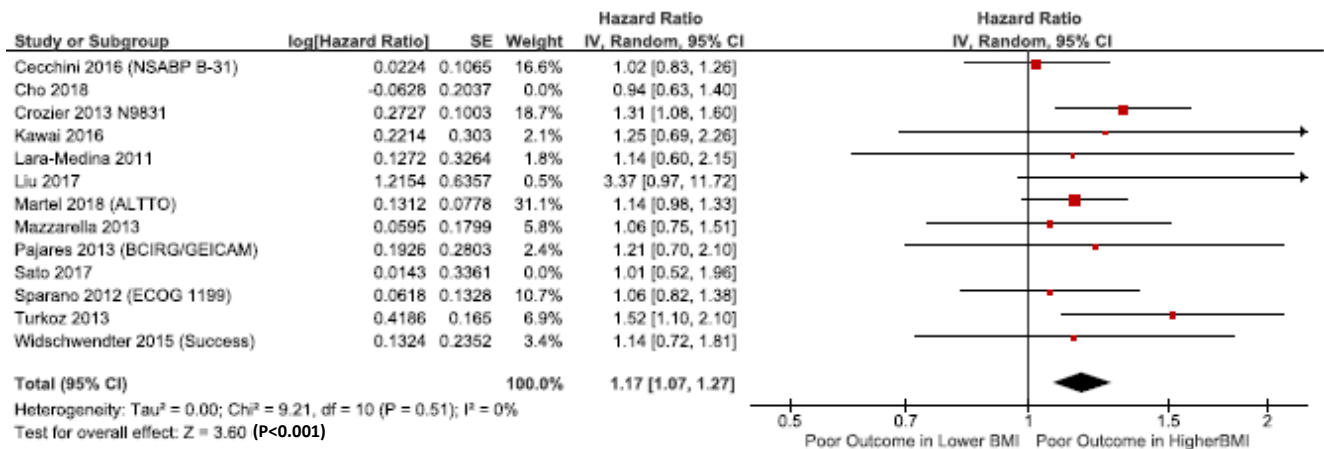

## 1D- OS in HER2+ Breast Cancer

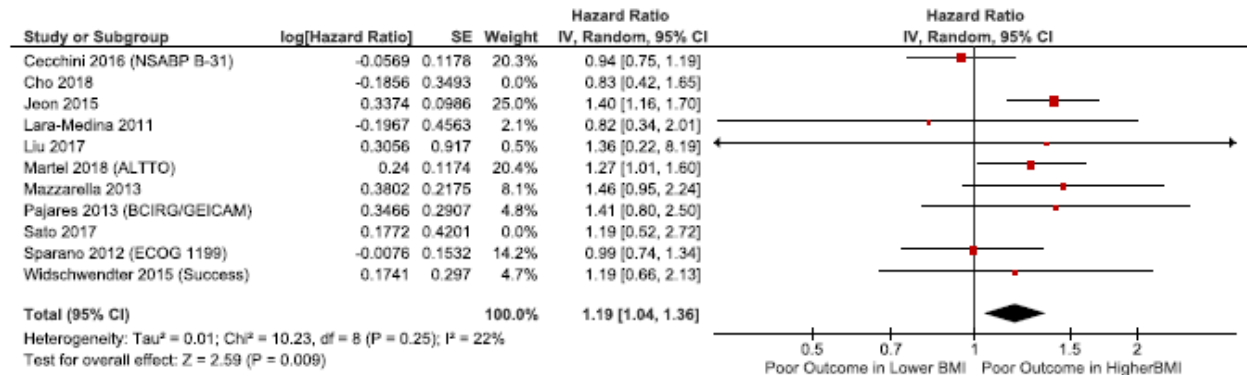

## 1E- DFS in TN Breast Cancer

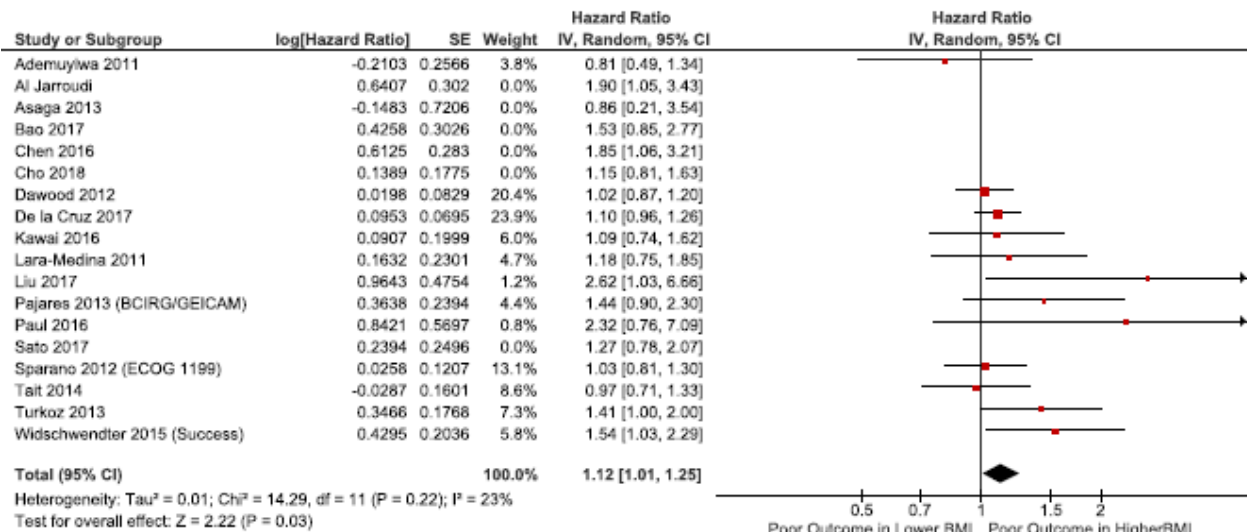

## 1F- OS in TN Breast Cancer

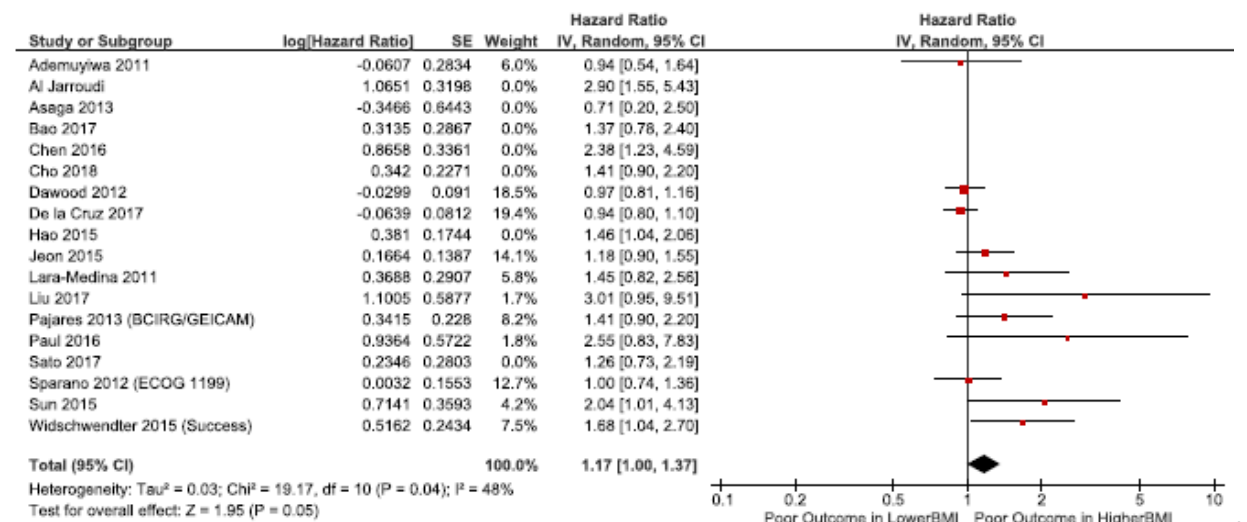

Studies that did not define obesity as BMI ≥ 30 are listed but were not included in the calculations (hazard ratio "Not estimable").

**Supplementary Figure 2- Funnel Plot of Studies Assessing Outcomes in Obese versus Non-Obese Groups by Breast Cancer Subtypes with more than 10 studies in each subgroup**

**2A- DFS in HR+HER2- Breast Cancer**

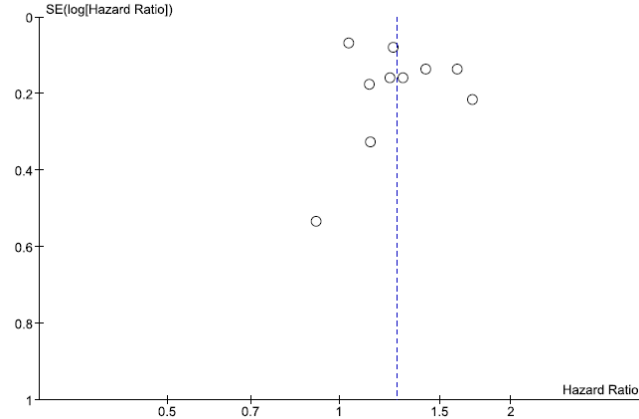

**2B- DFS in HER2+ Breast Cancer**

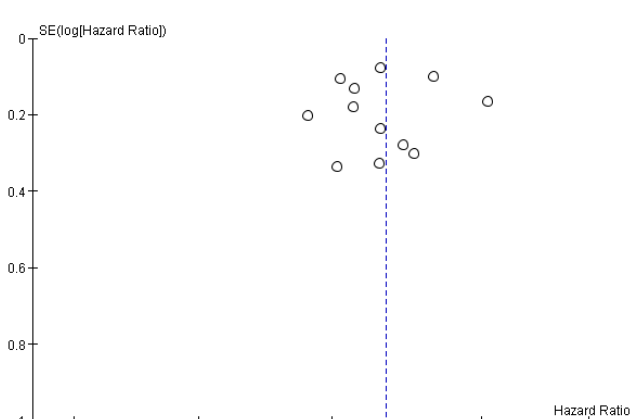

**2C- OS in HER2+ Breast Cancer**

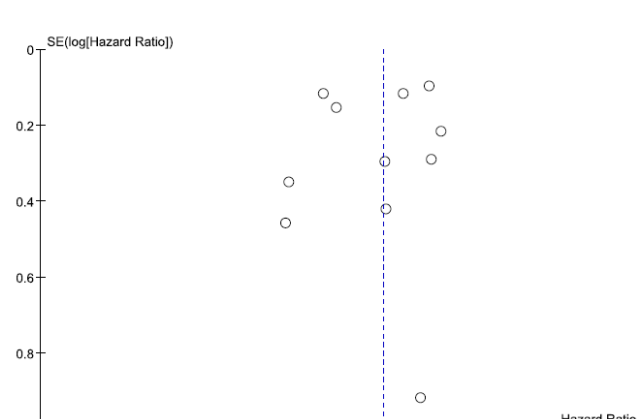

## 2D- DFS in TN Breast Cancer

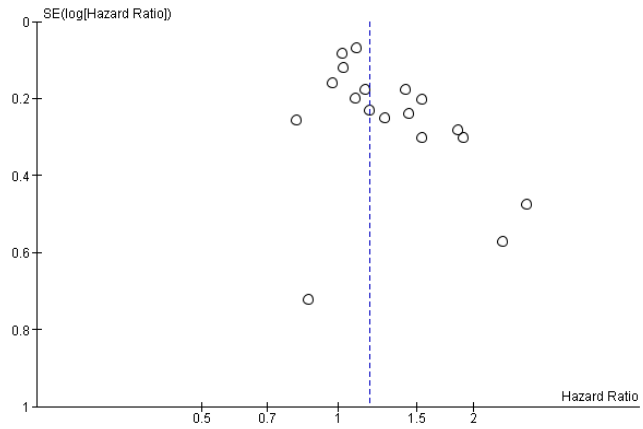

## 2E- OS in TN Cancer

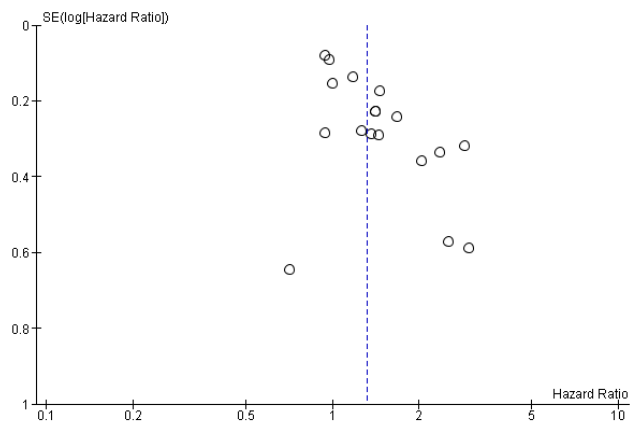

\*Funnel plot for OS in ER+ was not assessed due to fewer than 10 studies

Abbreviations: DFS: Disease-free survival, OS: Overall Survival, HR+HER2-: Hormone receptor positive and HER2 negative, HER2+: HER2 positive, TN: Triple negative

Supplementary Table 1- Baseline patient characteristics of included studies.

| Author                                             | n     | Menopausal status     | Stage                                                                                                | Grade                                    | Ethnicity/country of origin                                     | Histology                                                      | Subtype                                                                                 |
|----------------------------------------------------|-------|-----------------------|------------------------------------------------------------------------------------------------------|------------------------------------------|-----------------------------------------------------------------|----------------------------------------------------------------|-----------------------------------------------------------------------------------------|
| Jeon et al., 2015 <sup>(24)</sup>                  | 41021 | n/a                   | T < 2 cm 21931<br>T ≥ 2 cm 19090<br>N - 25205<br>N + 15816                                           | I-II 20043<br>III 15890<br>unkn 5088     | Korea                                                           | n/a                                                            | HR+HER2- 21094<br>HR+HER2+ 4118<br>HR-HER2+ 3887<br>TN 7436<br>unkn 4486                |
| Pajares et al., 2013 <sup>(16)</sup>               | 5683  | pre 3022<br>post 2661 | pT1 2794<br>pT2 2665<br>pT3 224<br>N - 2963<br>N + 2720                                              | I 499<br>II 2404<br>III 2391<br>unkn 389 | caucasian 98%                                                   | ductal 4809<br>lobular 510<br>mixed 62<br>others 301<br>unkn 1 | ER/PR both - 1502<br>ER/PR any + 4132<br>unkn 49<br>HER2+ 830<br>HER2- 4055<br>unkn 798 |
| Sparano et al., 2012 <sup>(5)</sup><br>E1199 trial | 4770  | pre 2219<br>post 2551 | T1 1726<br>T2 2532<br>T3 468<br>unkn 44<br>N0 553<br>N1 2645<br>N2 1084<br>N3 463<br>unkn 25         | n/a                                      | white 4031<br>hispanic 177<br>black 400<br>other 145<br>unkn 17 | n/a                                                            | ER/PR any + 3411<br>ER/PR both - 1293<br>unkn 66<br>HER2+ 940<br>HER2- 3344<br>unkn 486 |
| Sun et al., 2015 <sup>(25)</sup>                   | 1109  | pre 541<br>post 568   | T1 526<br>T2 455<br>T3 102<br>N - 665<br>N + 439<br>stage I 403<br>stage II 543<br>Stage III-IV* 133 | I-II 309<br>III 170                      | white 612<br>african american 497                               | ductal 911<br>others 198                                       | luminal 714<br>basal-like 197<br>her2+ 72<br>normal-like 126                            |

|                                                        |      |                                |                                                                                                               |                                         |                                                  |                                                         |                                                 |
|--------------------------------------------------------|------|--------------------------------|---------------------------------------------------------------------------------------------------------------|-----------------------------------------|--------------------------------------------------|---------------------------------------------------------|-------------------------------------------------|
| Ademuyiwa et al., 2011 <sup>(27)</sup>                 | 418  | n/a                            | N - 257<br>N + 161<br>stage I 154<br>stage II 199<br>stage III 65                                             | I-II 40<br>III 356<br>unkn 22           | caucasian 325<br>other 93                        | ductal 377<br>inflammatory 9<br>lobular 15<br>other 17  | TN 418                                          |
| Dawood et al., 2012 <sup>(32)</sup>                    | 2311 | pre 971<br>post 1328           | stage I 570<br>stage II 1177<br>stage III 526                                                                 | I 12<br>II 188<br>III 2043              | white 1508<br>black 417<br>other 386             | ductal 2091<br>lobular 22<br>mixed 26<br>other 148      | TN 2311                                         |
| Paul et al., 2016 <sup>(33)</sup>                      | 74   | n/a                            | n/a                                                                                                           | n/a                                     | n/a                                              | n/a                                                     | TN 74                                           |
| Tait et al., 2014 <sup>(34)</sup>                      | 448  | pre 159<br>post 257<br>unkn 32 | pCR 30<br>stage I 143<br>stage IIA 114<br>stage IIB 49<br>stage III 88<br>stage IV* 20<br>unkn 4              | I-II 60<br>III 386<br>unkn 2            | african american 136<br>caucasian 304<br>other 8 | n/a                                                     | TN 448                                          |
| Wid-Schwendter et al., 2015 <sup>(15)</sup>            | 3754 | pre 1565<br>post 2189          | pT1 1552<br>pT2 1929<br>pT3 198<br>pT4 52<br>unkn 23<br>pN0 1273<br>pN1 1705<br>pN2 511<br>pN3 236<br>unkn 29 | I 176<br>II 1783<br>III 1773<br>unkn 22 | n/a                                              | ductal 3060<br>lobular 419<br>other 253<br>unkn 22      | HR+HER2- 2045<br>HER2+ 883<br>TN 742<br>unkn 84 |
| Cecchini et al., 2016 <sup>(12)</sup><br>NSABPB31trial | 2102 | n/a                            | n/a                                                                                                           | n/a                                     | n/a                                              | n/a                                                     | HER2+ 2102                                      |
| Crozier et al., 2013 <sup>(13)</sup>                   | 3017 | pre 1610<br>post 1407          | pT < 2 cm 1002<br>pT ≥ 2 cm 2015<br>N - 403<br>N + 2614                                                       | I-II 858<br>III 2159                    | white 2532<br>other 455                          | ductal 2852<br>lobular 92<br>mucinous 12<br>papillary 5 | HR+HER2+ 1618<br>HR-HER2+ 1399                  |

|                                         |       |                                    |                                                                                              |                                |                                                                                                                             |                           |                                                                          |                                                  |     |            |
|-----------------------------------------|-------|------------------------------------|----------------------------------------------------------------------------------------------|--------------------------------|-----------------------------------------------------------------------------------------------------------------------------|---------------------------|--------------------------------------------------------------------------|--------------------------------------------------|-----|------------|
|                                         |       |                                    |                                                                                              |                                |                                                                                                                             |                           |                                                                          | medullary                                        | 11  |            |
|                                         |       |                                    |                                                                                              |                                |                                                                                                                             |                           |                                                                          | intra-ductal                                     | 3   |            |
|                                         |       |                                    |                                                                                              |                                |                                                                                                                             |                           |                                                                          | other                                            | 39  |            |
|                                         |       |                                    |                                                                                              |                                |                                                                                                                             |                           |                                                                          | missing                                          | 3   |            |
| Martel et al., 2018 <sup>(14)</sup>     | 8381  | n/a                                | n/a                                                                                          | n/a                            | n/a                                                                                                                         | n/a                       | n/a                                                                      | n/a                                              | n/a | HER2+ 8381 |
| Mazzarella et al., 2013 <sup>(26)</sup> | 1250  | pre 577<br>post 673                | pTx 12<br>pT1 680<br>pT2 467<br>pT3 78<br>pT4 13<br>N0 621<br>N1-3 343<br>N≥4 264<br>unkn 22 | I-II 419<br>III 795<br>unkn 36 | n/a                                                                                                                         | n/a                       | ductal 1138<br>lobular 30<br>mixed 19<br>other 63                        | HR+HER2+ 759<br>HR-HER2+ 491                     |     |            |
| Turkoz et al., 2013 <sup>(4)</sup>      | 818   | pre 818                            | T1-2 569<br>T3-4 164<br>N - 304<br>N + 427                                                   | I 71<br>II 289<br>III 325      | n/a                                                                                                                         | n/a                       | n/a                                                                      | luminal 561<br>HER2 over-expressing 65<br>TN 107 |     |            |
| Robinson et al., 2014 <sup>(22)</sup>   | 1199  | n/a                                | stage I 624<br>stage > I 536                                                                 | n/a                            | Australia 921<br>UK + Falklands 102<br>Europe 87<br>Asia 38<br>other (Oceania incl. NZ, Africa, North and South America) 36 | ductal 944<br>lobular 207 | HR+HER2- 1199                                                            |                                                  |     |            |
| Kawai et al., 2016 <sup>(18)</sup>      | 20090 | pre 6785<br>post 12576<br>unkn 729 | stage I 8304<br>stage II 9841<br>stage III 1945                                              | n/a                            | Japan                                                                                                                       | n/a                       | luminal A 9850<br>luminal B 3988<br>HER2 over-expressing 1485<br>TN 2993 |                                                  |     |            |

|                                          |      |             |           |                                                                                         |                                  |                                                                                 |                                   |                                                |                                  |
|------------------------------------------|------|-------------|-----------|-----------------------------------------------------------------------------------------|----------------------------------|---------------------------------------------------------------------------------|-----------------------------------|------------------------------------------------|----------------------------------|
|                                          |      |             |           |                                                                                         |                                  |                                                                                 |                                   | others                                         | 1774                             |
| Lara-Medina et al., 2011 <sup>(19)</sup> | 2065 | pre         | 1045      | stage I 9.7%<br>stage II 34.6%<br>stage III 44%<br>stage IV* 11.7%                      | I 12.4%<br>II 36.9%<br>III 50.8% | hispanic (Mexico)                                                               | ductal 82.70%<br>lobular<br>other | HR+HER2-<br>HER2+<br>TN                        | 56.5%<br>20.4%<br>23.1%          |
| De la Cruz et al., 2017 <sup>(17)</sup>  | 1495 | pre         | 45%       | T3-4 46.1%<br>N + 58.8%                                                                 | n/a                              | Peru                                                                            | n/a                               | TN                                             | 1495                             |
| Liu et al., 2018 <sup>(20)</sup>         | 273  | n/a         |           | cT1 39<br>cT2 171<br>cT3 63<br>clinical stage I-II 171<br>clinical stage III 99         | I-II 92<br>III 178               | non-hispanic white 91<br>non-hispanic black 66<br>hispanic 95<br>asian/other 16 | n/a                               | HR+/HER2-<br>HER2+<br>TN                       | 135<br>94<br>44                  |
| Bao et al., 2016 <sup>(30)</sup>         | 518  | post        | 53.1%     | stage I 30.89%<br>stage II 55.60%<br>stage III 10.23%<br>unkn 3.28%                     | n/a                              | China                                                                           | n/a                               | TN                                             | 518                              |
| Chen et al., 2016 <sup>(31)</sup>        | 206  | pre<br>post | 113<br>93 | pT1 76<br>pT2 112<br>pT3 18<br>pN0 121<br>pN1 50<br>pN2 27<br>pN3 8                     | low 65<br>median 141             | China                                                                           | n/a                               | TN                                             | 206                              |
| Cho et al., 2018 <sup>(6)</sup>          | 5668 | n/a         |           | pT1 3411<br>pT2 1980<br>pT3 263<br>pT4 14<br>pN0 3350<br>pN1 1608<br>pN2 440<br>pN3 264 | n/a                              | Korea                                                                           | n/a                               | HR+HER2-<br>HR+HER2+<br>HR-HER2+<br>TN<br>unkn | 3352<br>498<br>653<br>793<br>372 |



|                                  |      |                                |                                                                                                                              |                                    |         |                                     |                                                         |
|----------------------------------|------|--------------------------------|------------------------------------------------------------------------------------------------------------------------------|------------------------------------|---------|-------------------------------------|---------------------------------------------------------|
| Sato et al.,2017<br>(23)         | 1924 | pre 632<br>post 1289<br>unkn 3 | unkn 6<br>clinical stage I 836<br>clinical stage II 899<br>clinical stage III 189                                            | n/a                                | Japan   | n/a                                 | HR+HER2- 1371<br>HR+HER2+ 117<br>HR-HER2+ 141<br>TN 295 |
| Ohara et al.,<br>2015 (21)       | 184  | post 184                       | pT1 130<br>pT2 49<br>pT3 1<br>pT4 4<br>N- 144<br>N+ 40                                                                       | I 25<br>II 132<br>III 22<br>unkn 5 | Japan   | ductal 164<br>lobular 4<br>other 16 | HR+HER2- 184                                            |
| Al Jarroudi et<br>al., 2017 (28) | 115  | pre 85<br>post 30              | T ≤ 3 cm 42<br>T > 3 cm 73<br>N- 48<br>N+ 67                                                                                 | I-II 65<br>III 50                  | Morocco | n/a                                 | TN 115                                                  |
| Hao et al.,2015<br>(35)          | 1106 | pre 568<br>post 538            | T ≤ 2 cm 456<br>T > 2 cm 632<br>N- 652<br>N+ 454                                                                             | I-II 462<br>III 602                | China   | n/a                                 | TN 1106                                                 |
| Asaga et<br>al.,2013 (29)        | 135  | pre 57<br>post 78              | cT1 6<br>cT2 75<br>cT3 34<br>cT4 20<br>cN- 73<br>cN+ 62<br>pT1 70<br>pT2 35<br>pT3 20<br>pN0 71<br>pN1 41<br>pN2 15<br>pN3 8 | I 6<br>II 42<br>III 87             | Japan   | ductal 112<br>lobular 9<br>other 14 | TN 135                                                  |

.N.B. Values represent absolute number of patients, except when only % were reported (%) or values unavailable (n/a) \* not included in DFS analyses. N/a: not available, unkn: unknown.

Supplementary Table 2- Association of Obesity with Overall Survival (OS) and Disease-free Survival (DFS) in Relation to the Triple Negative Breast Cancer Subtype, Broken Down by Menopausal status.

| Study                                      | HR for                      | Group          | Outcome | n, HR, 95% CI                      | Pooled HR                               |
|--------------------------------------------|-----------------------------|----------------|---------|------------------------------------|-----------------------------------------|
| Sato et al., 2017 <sup>(23)</sup>          | BMI $\geq$ 25 vs <25        | Premenopausal  | OS      | n=80, HR=2.10, 95% CI=0.69-6.05    | HR: 2.40<br>95%CI: 1.50-3.86<br>P<0.001 |
| Al Jarroudi et al., 2017 <sup>(28)</sup>   | BMI $\geq$ 25 vs <25        |                |         | n=85, HR=2.752, 95% CI=1.267-5.978 |                                         |
| Hao et al., 2015 <sup>35</sup>             | BMI > 24 vs $\leq$ 24       |                |         | n=568, HR=2.27, 95% CI=1.11-4.63   |                                         |
| Sato et al., 2017 <sup>(23)</sup>          | BMI $\geq$ 25 vs <25        | Postmenopausal | OS      | n=214, HR=1.07, 95% CI=0.55-2.01   | HR: 1.03<br>95% CI: 0.70-1.50<br>P=0.89 |
| Al Jarroudi et al., 2017 <sup>(28)</sup>   | BMI $\geq$ 25 vs <25        |                |         | n=30, HR=1.345 95% CI=0.375-4.831  |                                         |
| Hao et al., 2015 <sup>(35)</sup>           | BMI > 24 vs $\leq$ 24       |                |         | n=538, HR=0.96, 95% CI=0.58-1.58   |                                         |
| Sato et al., 2017 <sup>(23)</sup>          | BMI $\geq$ 25 vs <25        | Premenopausal  | DFS     | n=80, HR=0.57, 95% CI=0.48-4.56    | HR: 1.44<br>95% CI: 0.68-3.03<br>P=0.34 |
| Al Jarroudi et al., 2017 <sup>(2017)</sup> | BMI $\geq$ 25 vs <25        |                |         | n=85, HR=3.248, 95% CI=1.249-8.412 |                                         |
| Turkoz et al., 2013 <sup>(4)</sup>         | BMI $\geq$ 30 vs. 18.5-24.9 |                |         | n=733, HR=1.41, 95% CI=1.0-2.0     |                                         |

BMI: body mass index, HR: hazard ratio, CI: confidence interval



## References

1. Chan DS, Vieira AR, Aune D, et al. Body mass index and survival in women with breast cancer-systematic literature review and meta-analysis of 82 follow-up studies. *Ann Oncol* 2014; 25:1901-1914
2. Niraula S, Ocana A, Ennis M, et al. Body size and breast cancer prognosis in relation to hormone receptor and menopausal status: A meta-analysis. *Breast Cancer Res Treat* 2012; 134:769-781, 2012
3. Mei L, He L, Song Y, Lv Y, Zhang L, Hao F, Xu M. Association between obesity with disease-free survival and overall survival in triple-negative breast cancer: A meta-analysis. *Medicine (Baltimore)* 2018; 97:1-7
4. Turkoz FP, Solak M, Petekkayal et al. The prognostic impact of obesity on molecular subtypes of breast cancer in premenopausal women. *J BUON*. 2013; 18(2):335-41.
5. Sparano JA, Wang M, Zhao F, et al. Obesity at diagnosis is associated with inferior outcomes in hormone receptor-positive operable breast cancer. *Cancer* 2012;118: 5937-5946
6. Cho WK, Choi DH, Park YH, et al: Effect of body mass index on survival in breast cancer patients according to subtype, metabolic syndrome, and treatment. *Clinical Breast Cancer* 2018; 18(5):1141-1147
7. Lohmann AE, Soldera S, Pimentel I, Ribnikar D, Ennis M, Amir E, Goodwin PJ. Association of obesity with breast cancer outcome in relation to cancer subtypes. PROSPERO 2020 CRD42020130723 Available from:  
[https://www.crd.york.ac.uk/prospero/display\\_record.php?ID=CRD42020130723](https://www.crd.york.ac.uk/prospero/display_record.php?ID=CRD42020130723)

8. Moher D, Liberati A, Tetzlaff J, et al. The PRISMA Group. Preferred Reporting Items for Systematic Reviews and Meta-Analyses: The PRISMA Statement. *PLoS Med.* 2009; 6(7): e1000097.
9. Andreas Stang. Critical evaluation of the newcastle-ottawa scale for the assessment of the quality of nonrandomized studies in meta-analyses. *European Journal of Epidemiology* 2010; (25)603-605, 2010
10. Borenstein M, Hedges LV, Higgins JP et al. A basic introduction to fixed-effect and random-effects models for meta-analysis. *Res Synth Methods.* 2010 Apr;1(2):97-111.
11. Higgins JPT, Green S (ed). Cochrane Handbook for Systematic Reviews of Interventions Version 5.1.0 [updated March 2011]. The Cochrane Collaboration, 2011 [www.handbook.cochrane.org](http://www.handbook.cochrane.org)
12. Cecchini RS, Swain SM, Costantino JP, et al. Body mass index at diagnosis and breast cancer survival prognosis in clinical trial populations from NRG oncology/NSABP B-30, B-31, B-34, and B-38. *Cancer epidemiology, biomarkers & prevention: a publication of the American Association for Cancer Research, cosponsored by the American Society of Preventive Oncology* 2016; 25:51-59
13. Crozier JA, Moreno-Aspitia A, Ballman KV, et al. Effect of body mass index on tumor characteristics and disease-free survival in patients from the HER2-positive adjuvant trastuzumab trial N9831. *Cancer* 2013; 119:2447-2454
14. Martel S, Lambertini M, Agbor-Tarh D, et al. Impact of body mass index (BMI) and weight change after treatment in patients (pts) with HER2-positive (HER2+) early breast cancer (EBC): Secondary analysis of the ALTTO BIG 2-06 trial. *Journal of Clinical Oncology* 2018; (36) :10067

15. Widschwendter P, Friedl TW, Schwentner L, et al. The influence of obesity on survival in early, high-risk breast cancer: Results from the randomized SUCCESS A trial. *Breast Cancer Res* 2015; 17(1): 129.
16. Pajares B, Pollán M, Martín M, et al. Obesity and survival in operable breast cancer patients treated with adjuvant anthracyclines and taxanes according to pathological subtypes: A pooled analysis. *Breast cancer research* 2013; 15: R105
17. De la Cruz Ku, Gabriel Antonio, Enriquez D, Morante Z, et al: Survival prognostic value of obesity in localized triple negative breast cancer in peruvian women. *Journal of Clinical Oncology* 2017; 35:e12100
18. Kawai M, Tomotaki A, Miyata H, et al: Body mass index and survival after diagnosis of invasive breast cancer: A study based on the japanese national clinical Database—Breast cancer registry. *Cancer Medicine* 2016; 5:1328-1340
19. Lara-Medina F, Pérez-Sánchez V, Saavedra-Pérez D, et al: Triple-negative breast cancer in hispanic patients: High prevalence, poor prognosis, and association with menopausal status, body mass index, and parity. *Cancer* 2011; 117:3658-3669
20. Liu Y, Saraf A, Catanese B, et al: Obesity and survival in the neoadjuvant breast cancer setting: Role of tumor subtype in an ethnically diverse population. *Breast Cancer Res Treat* 2018; 167:277-288
21. Ohara M, Akimoto E, Noma M, et al. Prognostic impact of progesterone receptor status combined with body mass index in breast cancer patients treated with adjuvant aromatase inhibitor. *Oncology Letters* 2015; 10:3286-3292

22. Robinson PJ, Bell RJ, Davis SR et al. Obesity is associated with a poorer prognosis in women with hormone receptor positive breast cancer. *Maturitas*. 2014 Nov;79(3):279-86.
23. Sato M, Terai S, Tachikawa H, Maeda H, Yamamoto M, Tomioka N, Watanabe K, Takahashi M: Obesity is associated with poor prognosis of Japanese breast cancer, especially in ER positive/HER2 negative subtype, which tendency is prominent. San Antonio Breast Cancer Symposium 2017 P1-07-13, 2017 (abstr)
24. Jeon Y, Kang S, Park MH, et al. Relationship between body mass index and the expression of hormone receptors or human epidermal growth factor receptor 2 with respect to breast cancer survival. *BMC Cancer* 2015; 15:865
25. Sun X, Nichols H, Robinson W, et al: Post-diagnosis adiposity and survival among breast cancer patients: Influence of breast cancer subtype. *Cancer Causes Control* 2015, 26:1803-1811
26. Mazzeo L, Disalvatore D, Bagnardi V et al. Obesity increases the incidence of distant metastases in oestrogen receptor-negative human epidermal growth factor receptor 2-positive breast cancer patients. *European Journal of Cancer* 2013; 49:3588-3597
27. Ademuyiwa FO, Groman A, O'Connor T, et al. Impact of body mass index on clinical outcomes in triple-negative breast cancer. *Cancer* 2011; 117:4132-4140
28. Al Jarroudi O, Abda N, Seddik Y, et al. Overweight: Is It a Prognostic Factor in Women with Triple-Negative Breast Cancer? *Asian Pac J Cancer Prev*. 2017;18:1519-1523



29. Asaga S, Kinoshita T, Hojo T, et al. Prognostic factors for triple-negative breast cancer patients receiving preoperative systemic chemotherapy. *Clin Breast Cancer* 2013;13: 40-46
30. Bao PP, Cai H, Peng P, et al. Body mass index and weight change in relation to triple-negative breast cancer survival. *Cancer Causes Control* 2016; 27:229-236
31. Chen H, Ding A, Wang M. Impact of central obesity on prognostic outcome of triple negative breast cancer in chinese women. *Springer Plus* 2016; 5:1-8
32. Dawood S, Lei X, Litton J et al. Impact of body mass index on survival outcome among women with early stage triple-negative breast cancer. *Clinical Breast Cancer* 2012; 12:364-372
33. Paul S, Yendala R, Raja NP, et al: Influence of obesity on survival in non-metastatic triple negative breast cancer; a retrospective analysis. *Journal of Clinical Oncology* 2016; 34:e12546
34. Tait S, Pacheco J, Gao F, et al: Body mass index, diabetes, and triple-negative breast cancer prognosis. *Breast Cancer Res Treat* 2014; 146:189-197
35. Hao S, Liu Y, Yu K, et al. Overweight as a prognostic factor for triple-negative breast cancers in chinese women. *PLoS One* 2015; 10:e0129741
36. Nattenmüller CJ, Kriegsmann M, Sookthai D, et al: Obesity as risk factor for subtypes of breast cancer: results from a prospective cohort study. *BMC Cancer* 2018; 18:616

37. Lohmann AE, Goodwin PJ, Chlebowski RT, et al: Association of obesity-related metabolic disruptions with cancer risk and outcome. *Journal of clinical oncology: official journal of the American Society of Clinical Oncology* 2016; 34:4249-4255
38. Griggs JJ, Sorbero ME, Lyman GH. Undertreatment of obese women receiving breast cancer chemotherapy. *Arch Intern Med.* 2005 Jun 13;165(11):1267-73
39. Acheampong T, Kehm RD, Terry MB, Argov EL, Tehranifar P. Incidence Trends of Breast Cancer Molecular Subtypes by Age and Race/Ethnicity in the US From 2010 to 2016. *JAMA Netw Open.* 2020;165: 1267-73
40. Burstein MD, Tsimelzon A, Poage GM, et al: Comprehensive genomic analysis identifies novel subtypes and targets of triple-negative breast cancer. *Clinical cancer research: an official journal of the American Association for Cancer Research* 2015; 21:1688-1698
41. Perou CM: Molecular stratification of Triple-Negative breast cancers. *The Oncologist* 2010; 15:39-48
